# Supplementary material
Source: PubMed Central journal article supplement (PMC4214521)
Supplement: ASN.2013080896_ASN2013080896SupplementaryData1.pdf [file ASN.2013080896_ASN2013080896SupplementaryData1.pdf]

## Supplemental data

### Supplementary Figure 1. Analysis of the *Sall1* mutant mice

(A) (A': higher magnification) Nephrons formed in the *Six2<sup>GFP</sup>Cre;Sall1<sup>fllox/fllox</sup>* mice at E14.5 retain *Sall1* expression. *Sall1* is stained red and *Six2* is green. Scale bar=40  $\mu\text{m}$ .

(B)(C) *In situ* hybridization of *Etv4* (FGF activity) in *Sall1<sup>+fllox</sup>* and *Sall1<sup>CreER/fllox</sup>* kidneys at E14.5 (48hr after tamoxifen treatment), showing the intact expression in the progenitors (arrowheads). Expression in ureteric buds reflects *Gdnf* activity. Scale bar=100  $\mu\text{m}$ .

(D)(E) Immunostaining of *Six2* (green) and cytokeratin 8 (red) in *Sall1<sup>fllox/fllox</sup>* (D) and *Six2<sup>Cre</sup>;Sall1<sup>fllox/fllox</sup>* (E) kidneys in culture. E12.5 kidneys were treated with FGF2 (50ng/ml) and heparin (1ug/ml) and cultured for 2 days, but the phenotypes of the *Sall1* mutants were not rescued. Scale bar=100  $\mu\text{m}$ .

(F)(G) Immunostaining of *Lef1* (Wnt activity) *Sall1<sup>+fllox</sup>* and *Sall1<sup>CreER/fllox</sup>* kidneys at E14.5 (48hr after tamoxifen treatment). *Lef1* is expressed in the differentiating nephrons (arrows) and excluded from the progenitors (arrowheads) in both samples. Scale bar=100  $\mu\text{m}$ .

(H)(I) Whole mount *in situ* hybridization of *Wnt9b* in *Sall1<sup>+fllox</sup>* (H) and *Sall1<sup>CreER/fllox</sup>* (I) kidneys 48hr after tamoxifen treatment. Scale bar=100  $\mu\text{m}$ .

(J)(K) Whole mount *in situ* hybridization of *Wnt11* in *Sall1<sup>+fllox</sup>* (J) and *Sall1<sup>CreER/fllox</sup>* (K) kidneys 48hr after tamoxifen treatment. Scale bar=100  $\mu\text{m}$ .

(L) Quantitative RT-PCR of E14.5 kidneys. *Sall1<sup>+fllox</sup>* mice and *Sall1<sup>CreER/fllox</sup>* mice were treated with tamoxifen at E12.5. The columns represent means  $\pm$  SD (n=5). Primers are listed in Supplementary Table 4.

### Supplementary Figure 2. *Sall1* binding to gene loci that are essential for kidney development

(A) *Sall1* and *Six2* co-occupy *Pax2*, *Wt1*, *Gdnf*, and *Sall1* loci. Asterisk: peaks co-occupied by *Sall1* and *Six2*. Diamond: peaks reported in a study by Park et al. <sup>3</sup>

(B) *Sall1* but not *Six2* binds to the loci of *Hox* gene clusters.

(C) *Six2* but not *Sall1* binds to the *Fgf8* and *Bmp7* loci. The peak marked by # is an artifact, which is also detected in the IgG control sample.

### Supplementary Figure 3. Generation and analysis of *Sall1*Flag mouse

(A) Targeting strategy for *Sall1*Flag knock-in mouse. The stop codon of *Sall1* was replaced by the Flag tag. H: *HindIII*; E: *EcoRV*. The genomic DNA was digested with

*EcoRV* or *HindIII* and hybridized with 5' or 3' probes, respectively.

(B) Flag and Sall1 immunostaining of Sall1Flag mouse kidneys at E15.5. Scale bar=100  $\mu\text{m}$ .

(C) ChIP-qPCR analysis of the *Six2* locus using Sall1Flag mouse kidneys and the anti-Flag antibody. A binding peak is observed at region 2, which corresponds to the marked peak in Figure 6A. Primers are listed in Supplementary Table 4.

#### **Supplementary Figure 4. Overexpression of Nkx6.1 *in vivo* affects kidney development**

(A) Successful overexpression of Nkx6.1 in *Six2Cre: Nkx6.1 OE* kidneys at E14.5, shown by immunostaining using the anti-Nkx6.1 antibody.

(B) A mild size reduction of the *Six2Cre: Nkx6.1 OE* kidneys at P0. Hematoxylin-eosin staining.

(C) Scattered Six2-positive nephron progenitors in the *Six2Cre: Nkx6.1 OE* kidneys at P0. Scale bar=100  $\mu\text{m}$ .

#### **Supplementary Figure 5. *Wnt4Cre*-mediated deletion is not specific to differentiating nascent nephrons**

(A) *Wnt4Cre*-mediated *Sall1* deletion at E14.5.

(B) Lineage trace analysis of *Wnt4Cre* analyzed at E14.5. tdTomato is stained by the anti-RFP antibody (blue). Arrowheads: nephron progenitors; arrows: differentiating nephrons; ub: ureteric bud. Scale bar=50  $\mu\text{m}$ .

#### **Supplementary Video 1. Time-lapse analysis of nephron progenitor development in the control kidney**

*Six2CreGFP* kidneys were cultured at E12.5 on Millicell Cell Culture Inserts placed in dishes containing DMEM with 10% serum. The confocal time-lapse images were taken using a CellVoyager CV1000. GFP-positive nephron progenitors expand as the ureteric bud branches.

#### **Supplementary Video 2. Time-lapse analysis of nephron progenitor depletion in *Sall1* deficiency**

*Six2CreGFP; Sall1<sup>flox/flox</sup>* kidneys were cultured at E12.5 on Millicell Cell Culture Inserts placed in glass-bottomed dishes containing DMEM with 10% serum. Confocal time-lapse images were taken using a CellVoyager CV1000. GFP signal decreased rapidly in the absence of *Sall1*.

**Supplementary Table 1. Down-regulated genes in the absence of *Sall1***

Decreased expression of a series of genes in *Sall1* mutant kidneys compared with that in their respective controls. Most of the down-regulated genes in the absence of *Sall1* are expressed more abundantly in *Six2*(+) cells than in *Six2*(-) cells. *Sall1*- and *Six2*-binding peaks detected in our ChIP-Seq analysis were compared with *Six2*-binding peaks in the study by Park et al.<sup>3</sup> (mm9 coordinates). Asterisks and diamonds correspond to those in Figure 6 and Supplementary Figure 2.

**Supplementary Table 2. Up-regulated genes in the absence of *Sall1***

Increased gene expression in a series of *Sall1* mutant kidneys compared with their respective controls. Most of the up-regulated genes are expressed more abundantly in *Six2*(-) cells than in *Six2*(+) cells. *Sall1*- and *Six2*-binding peaks detected in our ChIP-Seq analysis were compared with *Six2*-binding peaks in the study by Park et al.<sup>3</sup> (mm9 coordinates).

**Supplementary Table 3. Expression and ChIP-seq analysis of kidney developmental genes**

*Sall1*- and *Six2*-binding peaks detected in our ChIP-Seq analysis were compared with *Six2*-binding peaks in the study by Park et al.<sup>3</sup> (mm9 coordinates). Asterisks and diamonds correspond to those in Figure 6 and Supplementary Figure 2.

**Supplementary Table 4. Primers for ChIP-qPCR and quantitative RT-PCR, and oligonucleotides for EMSA.**

# Supplementary Figure 1

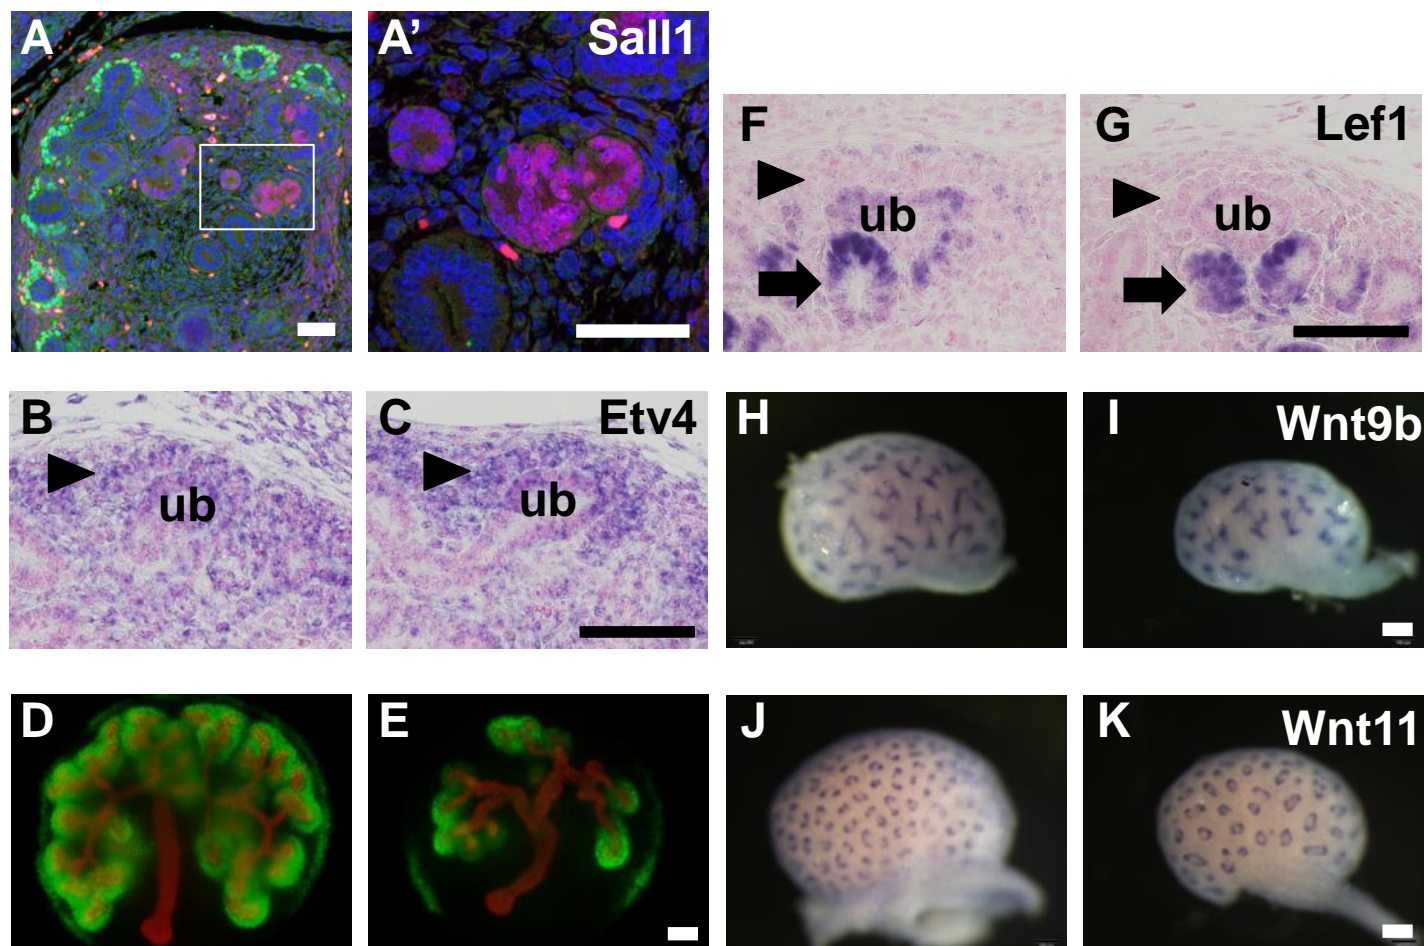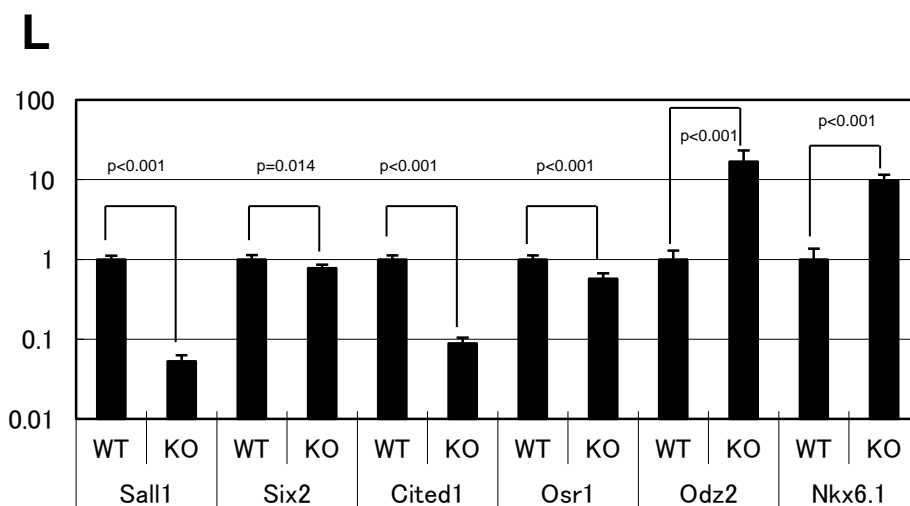

# Supplementary Figure 2

**A**

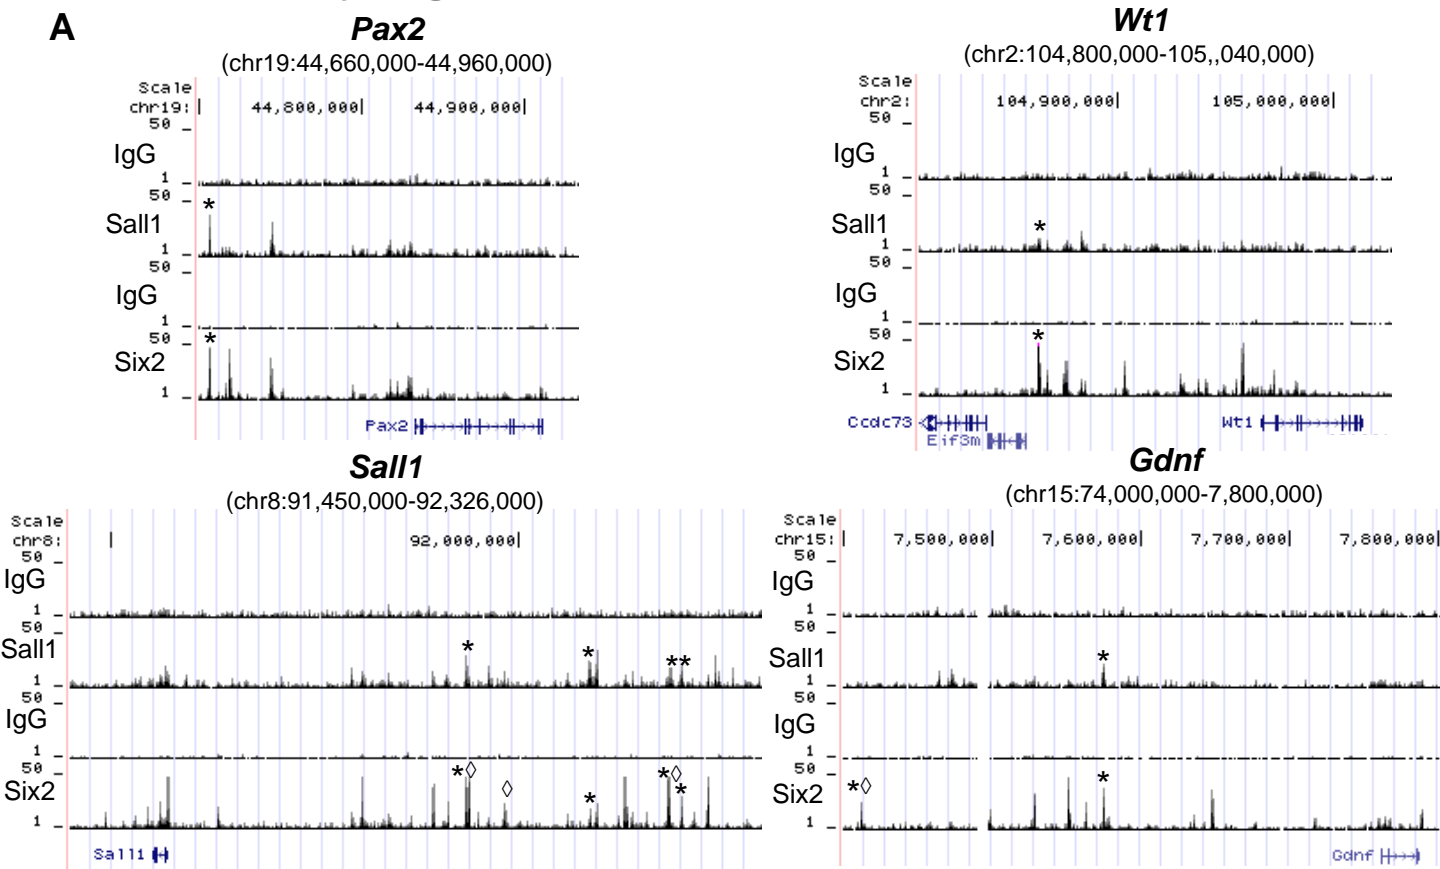

**B** *Hoxa1, a2, a3, a4, a5, a6, a7, a9, a10, a11, a13*

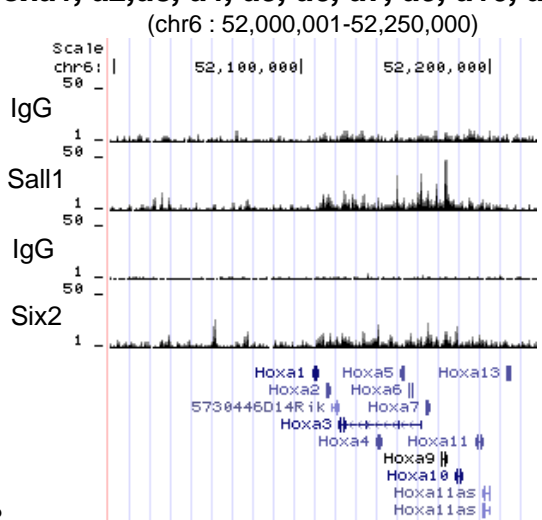

**C**

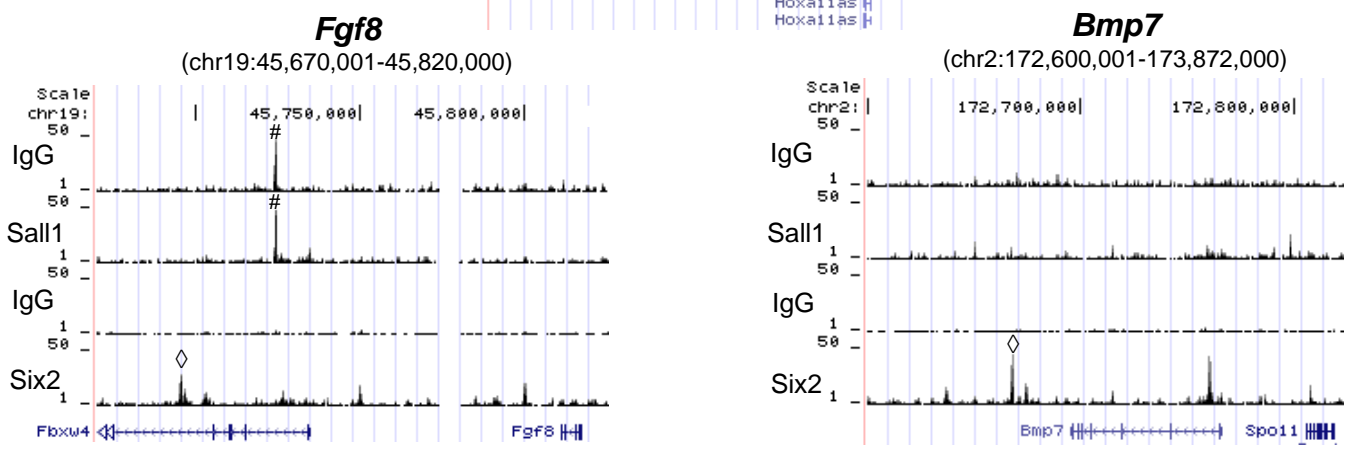

# Supplementary Figure 3

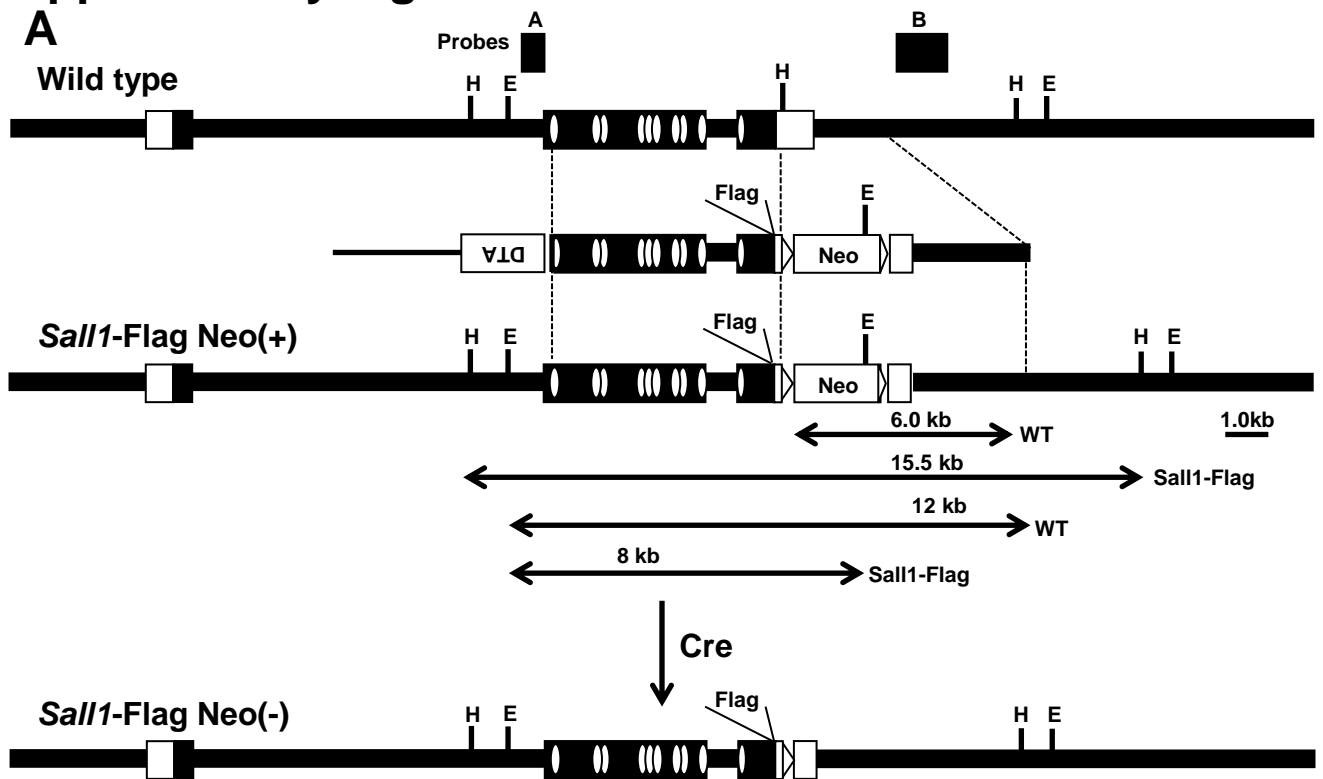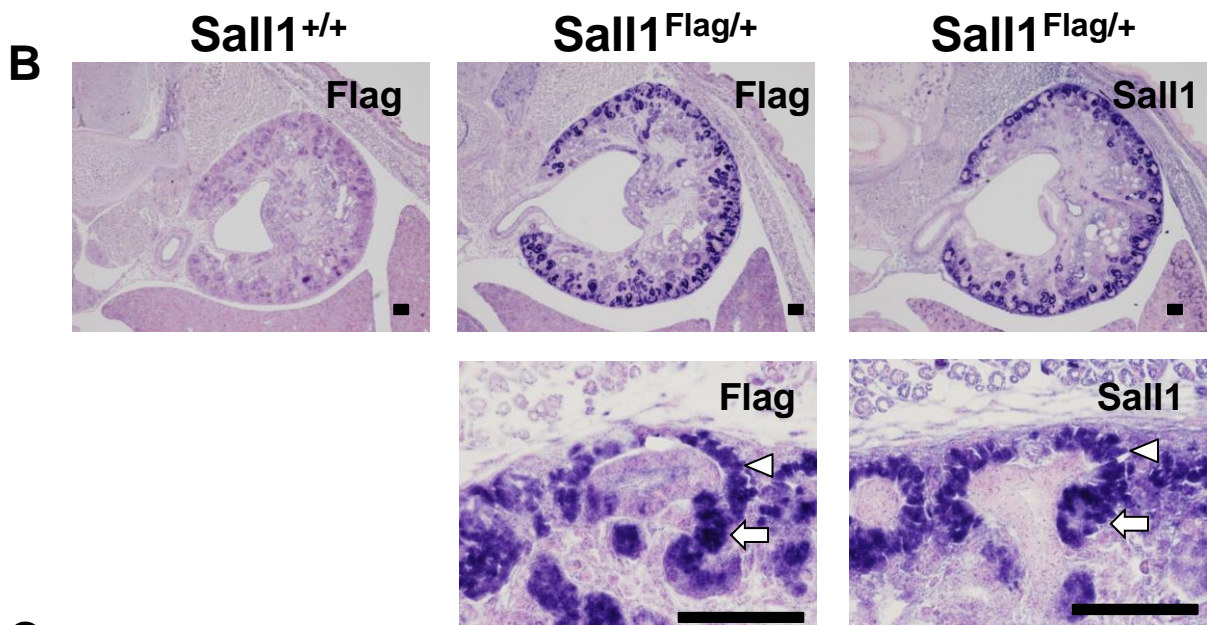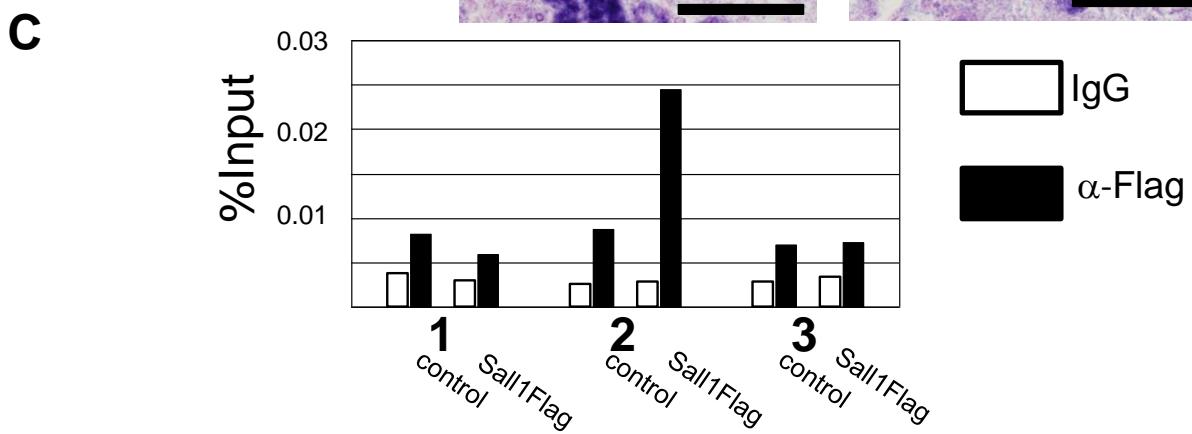



# Supplementary Figure 4

**Nkx6.1OE**

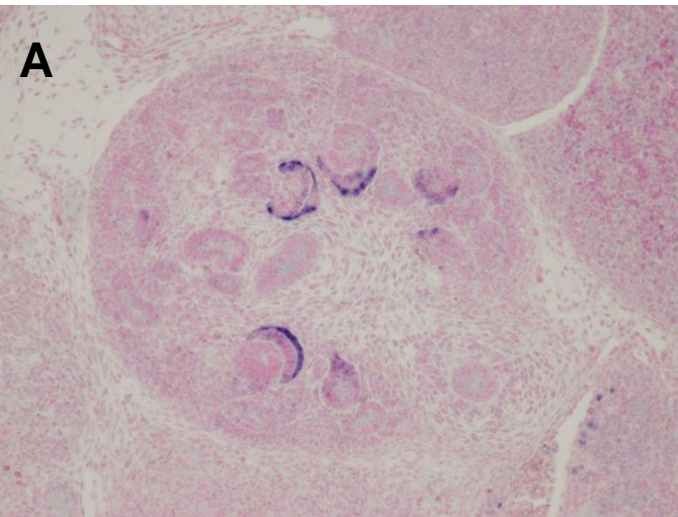

**Six2GFP-Cre;Nkx6.1OE**

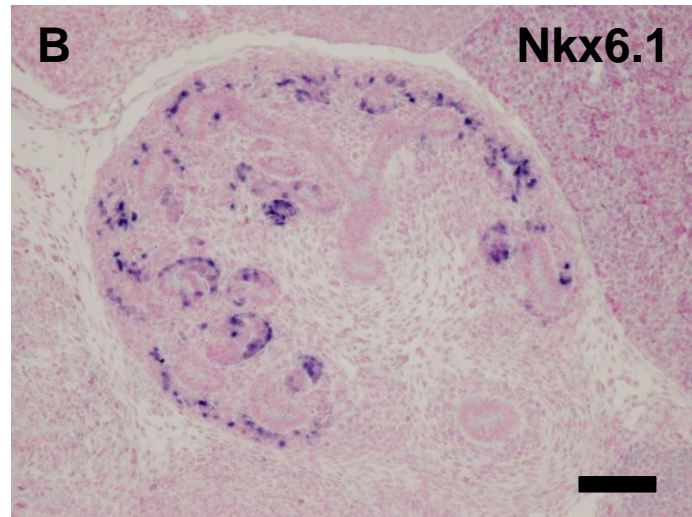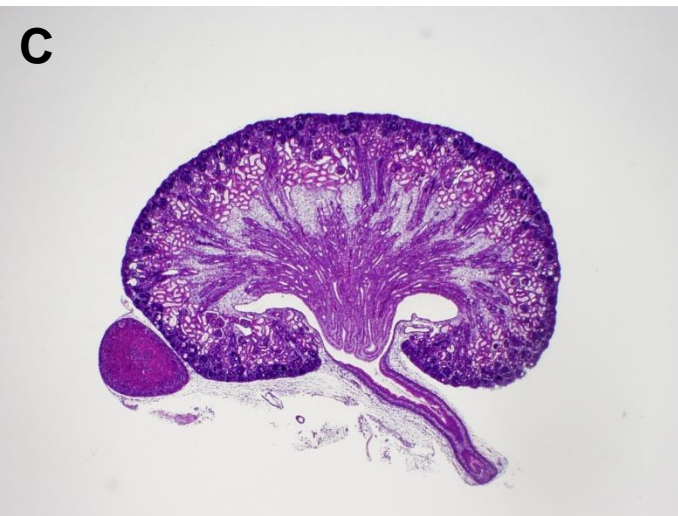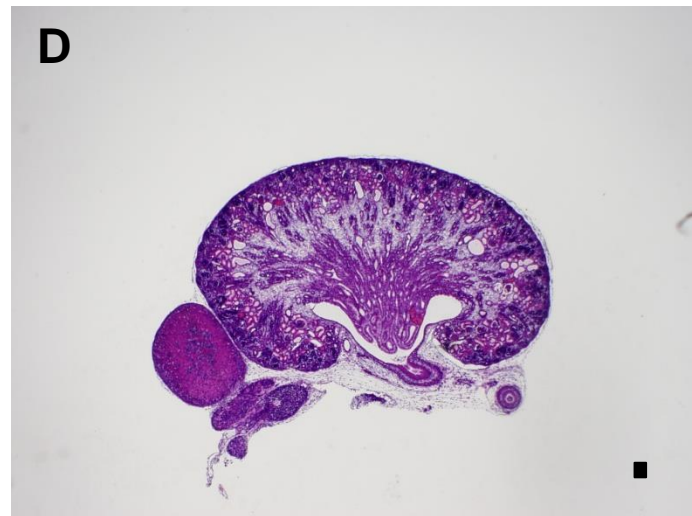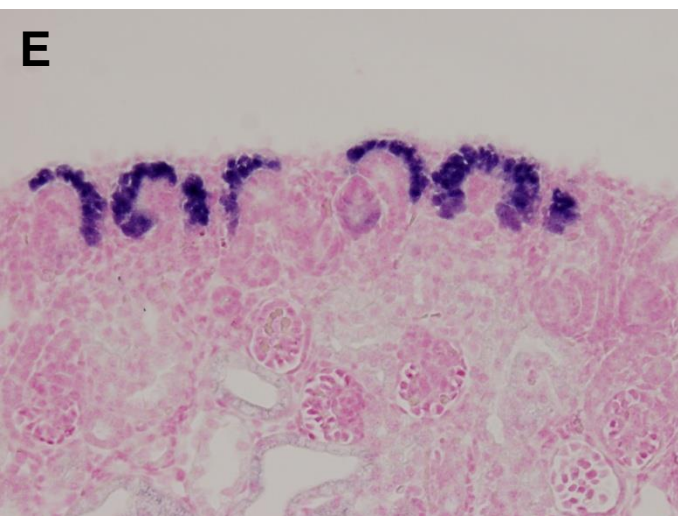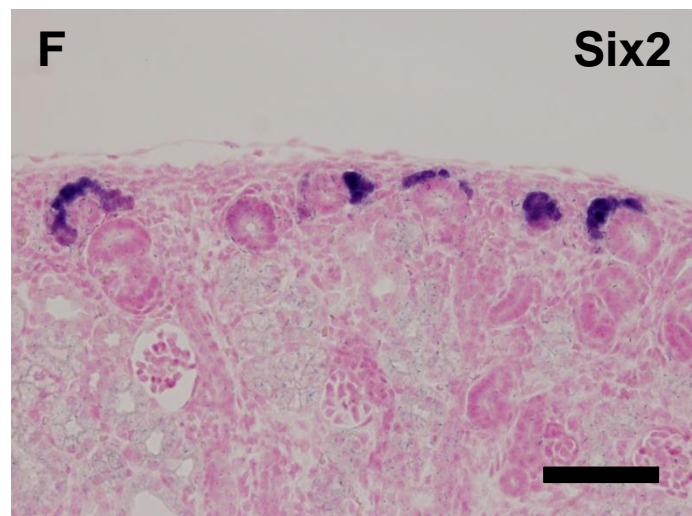



# Supplementary Figure 5

**A**

**Sall1<sup>flx/flx</sup>**

**Wnt4GFP-Cre:  
Sall1<sup>flx/flx</sup>**

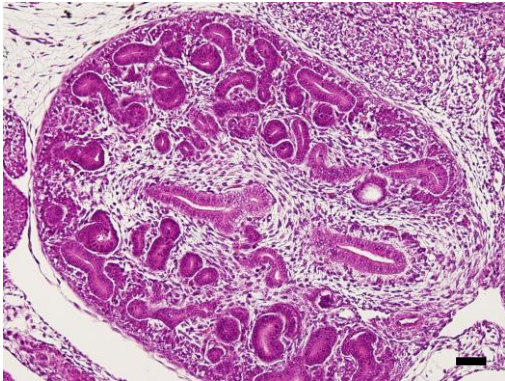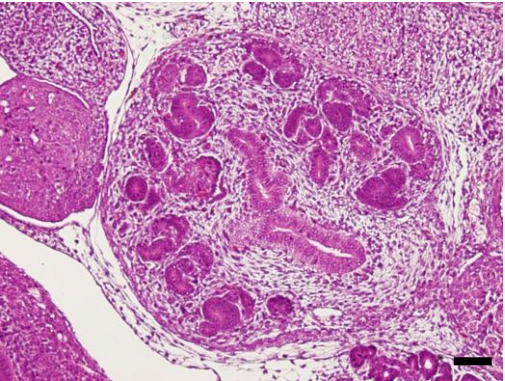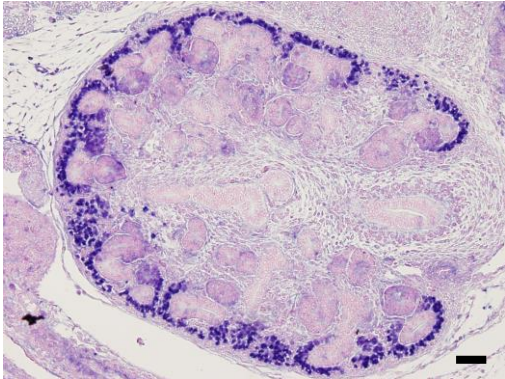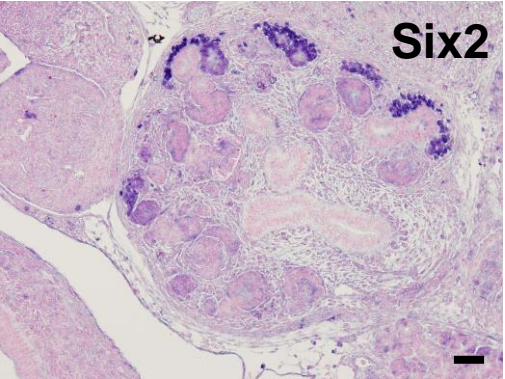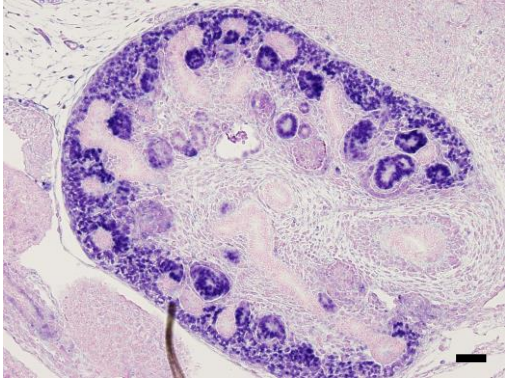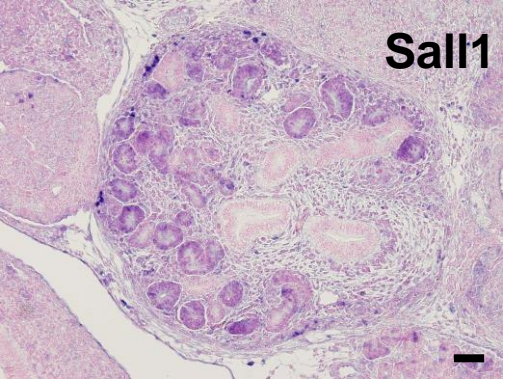

**B**

**tdTomato**

**Wnt4GFP-Cre;  
tdTomato**

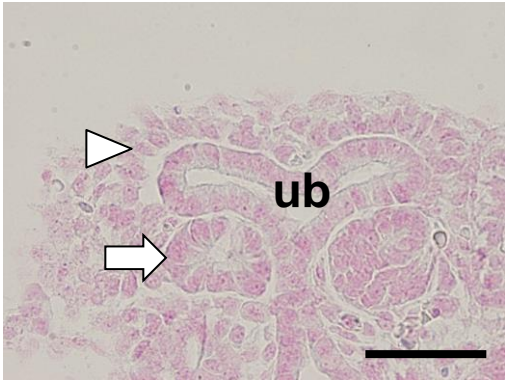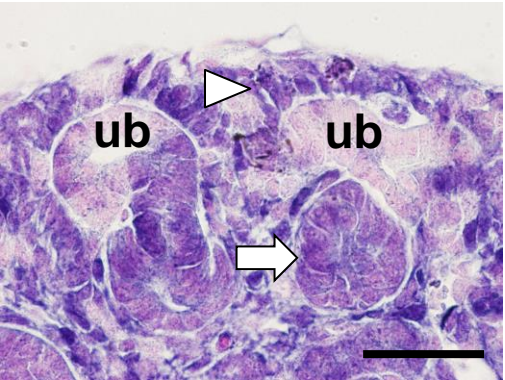



Supplementary Table 1

| GeneSymbol    | GeneName                                                                                 | Log2 (Sal1 <sup>CreER/lox</sup> 48hr) | Log2 (Sal1 <sup>CreER/lox</sup> 24hr) | Log2 (Six2Cre; Sal1 <sup>lox/lox</sup> ) | Log2 (Six2 GFP+ vs GFP-) | Sal1 binding                                                                                                                                         | Six2 binding                                                                               | Six2 binding (Park et al.; ref3)                           |
|---------------|------------------------------------------------------------------------------------------|---------------------------------------|---------------------------------------|------------------------------------------|--------------------------|------------------------------------------------------------------------------------------------------------------------------------------------------|--------------------------------------------------------------------------------------------|------------------------------------------------------------|
| Ocm           | oncomodulin                                                                              | -3.78                                 | -2.59                                 | -1.78                                    | 7.05                     | absent                                                                                                                                               | chr5:144,793,500-144,793,600                                                               | chr5:144,793,471-144,793,622                               |
| Cled1         | Cbp/p300-interacting transactivator with Glu/Asp-rich carboxy-terminal domain 1          | -2.85                                 | -2.20                                 | -4.16                                    | 4.80                     | absent                                                                                                                                               | chrX:99,515,160-99,515,460                                                                 | absent                                                     |
| Sal1          | sal-like 1 (Drosophila)                                                                  | -2.78                                 | -0.74                                 | -1.25                                    | 1.64                     | chr8:91,559,382-91,564,748<br>chr8:91,504,911-914,563                                                                                                | chr8:91,569,591-91,571,276<br>chr8:91,912,350-91,913,805                                   |                                                            |
|               |                                                                                          |                                       |                                       |                                          |                          | chr8:91,935,147-91,937,179*<br>chr8:91,962,070-91,964,145                                                                                            | chr8:91,935,304-91,937,293*<br>chr8:91,938,409-91,940,376                                  | chr8:91,936,103-91,936,284<br>chr8:91,939,275-91,939,431   |
|               |                                                                                          |                                       |                                       |                                          |                          | chr8:92,085,399-92,088,663<br>chr8:92,092,399-92,094,667*<br>chr8:92,094,825-92,096,530                                                              | chr8:92,085,787-92,088,204<br>chr8:92,129,157-92,130,804*                                  |                                                            |
|               |                                                                                          |                                       |                                       |                                          |                          | chr8:92,182,190-92,186,278*                                                                                                                          | chr8:92,182,364-92,184,152*                                                                | chr8:92,130,054-92,130,238                                 |
|               |                                                                                          |                                       |                                       |                                          |                          | chr8:92,198,196-92,199,608*                                                                                                                          | chr8:92,184,846-92,186,022                                                                 |                                                            |
|               |                                                                                          |                                       |                                       |                                          |                          | chr8:92,230,090-92,242,534                                                                                                                           | chr8:92,198,196-92,199,608*                                                                |                                                            |
| Dync11        | dynein cytoplasmic 1 intermediate chain 1                                                | -2.30                                 | -1.12                                 | -1.85                                    | 3.30                     | absent                                                                                                                                               | chr6:5,683,998-5,685,382                                                                   | chr6:5,684,379-5,684,728                                   |
| Dkk1          | dickkopf homolog 1 (Xenopus laevis)                                                      | -2.15                                 | -1.00                                 | -1.89                                    | -5.32                    | absent                                                                                                                                               | absent                                                                                     | absent                                                     |
| Dkk1          | dickkopf homolog 1 (Xenopus laevis)                                                      | -2.03                                 | -1.00                                 | -1.73                                    | -6.57                    | shown in the other column                                                                                                                            |                                                                                            |                                                            |
| Galnt2        | UDP-N-acetyl-alpha-D-galactosamine: polypeptide N-acetylgalactosaminyltransferase-like 2 | -1.98                                 | -2.46                                 | -2.66                                    | 4.14                     | absent                                                                                                                                               | absent                                                                                     | absent                                                     |
| Pdm           | podoplanin                                                                               | -1.93                                 | -1.30                                 | -3.93                                    | 5.35                     | absent                                                                                                                                               | chr2:129,523,851-129,526,042                                                               | absent                                                     |
| Fgf1          | fibroblast growth factor 1                                                               | -1.83                                 | -2.48                                 | -1.68                                    | 5.40                     | absent                                                                                                                                               | chr18:39,034,094-39,035,438<br>chr18:39,040,772-39,042,700                                 | chr18:39,034,516-39,034,806<br>chr18:39,041,961-39,042,307 |
| Mxd1          | monooxygenase, DBH-like 1                                                                | -1.42                                 | -1.11                                 | -1.20                                    | 1.57                     | absent                                                                                                                                               | absent                                                                                     | absent                                                     |
| Fgf1          | fibroblast growth factor 1                                                               | -1.17                                 | -0.61                                 | -1.62                                    | 4.35                     | shown in the other column                                                                                                                            |                                                                                            |                                                            |
| Gm5213        | predicted gene 5213                                                                      | -1.16                                 | -0.63                                 | -1.65                                    | 5.01                     | absent                                                                                                                                               | absent                                                                                     | absent                                                     |
| Capn6         | calpain 6                                                                                | -1.10                                 | -0.67                                 | -0.85                                    | 2.99                     | absent                                                                                                                                               | absent                                                                                     | absent                                                     |
| Lbx2          | ladybird homeobox homolog 2 (Drosophila)                                                 | -1.07                                 | -0.78                                 | -1.29                                    | 2.79                     | absent                                                                                                                                               | absent                                                                                     | absent                                                     |
| Tcfap2c       | transcription factor AP-2, gamma                                                         | -1.07                                 | -0.69                                 | -0.80                                    | -4.06                    | absent                                                                                                                                               | absent                                                                                     | absent                                                     |
| Wnt6          | wingless-related MMTV integration site 6                                                 | -1.04                                 | -1.06                                 | -1.45                                    | 3.01                     | absent                                                                                                                                               | absent                                                                                     | absent                                                     |
| H2-Eb1        | histocompatibility 2, class II antigen E beta                                            | -1.02                                 | -0.65                                 | -1.13                                    | 0.49                     | absent                                                                                                                                               | absent                                                                                     | absent                                                     |
| Osr1          | odc-skipped related 1 (Drosophila)                                                       | -1.01                                 | -0.85                                 | -0.88                                    | 5.15                     | chr12:9,265,136-9,266,406                                                                                                                            |                                                                                            |                                                            |
|               |                                                                                          |                                       |                                       |                                          |                          | chr12:9,583,063-98,855,408                                                                                                                           |                                                                                            |                                                            |
|               |                                                                                          |                                       |                                       |                                          |                          |                                                                                                                                                      | chr12:9,663,412-9,665,066                                                                  |                                                            |
|               |                                                                                          |                                       |                                       |                                          |                          |                                                                                                                                                      | chr12:9,990,482-9,906,011*                                                                 |                                                            |
|               |                                                                                          |                                       |                                       |                                          |                          |                                                                                                                                                      | chr12:10,134,583-10,136,241                                                                |                                                            |
|               |                                                                                          |                                       |                                       |                                          |                          |                                                                                                                                                      | chr12:10,141,955-10,143,714                                                                |                                                            |
| Robo2         | roundabout homolog 2 (Drosophila)                                                        | -1.00                                 | -0.70                                 | -0.66                                    | 3.56                     | chr16:73,529,347-73,531,168                                                                                                                          | chr12:10,237,565-10,239,324<br>chr16:73,530,336-73,530,636<br>chr16:73,533,609-73,533,909  | chr12:10,238,413-10,238,627<br>absent                      |
|               |                                                                                          |                                       |                                       |                                          |                          | chr16:74,457,123-74,459,457*                                                                                                                         | chr16:74,457,244-74,459,474*<br>chr16:74,464,261-74,466,231<br>chr16:74,467,369-74,469,755 | chr16:74,458,499-74,458,753                                |
|               |                                                                                          |                                       |                                       |                                          |                          | chr16:74,513,516-74,516,233*                                                                                                                         | chr16:74,514,010-74,516,020*                                                               | chr16:74,514,689-74,515,212                                |
| C2cd4b        | C2 calcium-dependent domain containing 4B                                                | -0.99                                 | -1.27                                 | -1.41                                    | 5.18                     | absent                                                                                                                                               | absent                                                                                     | absent                                                     |
| Nefl          | neurofilament, light polypeptide                                                         | -0.95                                 | -0.79                                 | -0.92                                    | 3.70                     | absent                                                                                                                                               | absent                                                                                     | absent                                                     |
| Sik3a         | serine/threonine kinase 32A                                                              | -0.95                                 | -1.14                                 | -2.31                                    | 3.50                     | absent                                                                                                                                               | chr18:43,442,666-43,444,253                                                                | chr18:43,443,559-43,443,715                                |
| Osr1          | odc-skipped related 1 (Drosophila)                                                       | -0.94                                 | -0.85                                 | -0.82                                    | 4.72                     | shown in the other column                                                                                                                            |                                                                                            |                                                            |
| Snap91        | synaposomal-associated protein 91                                                        | -0.93                                 | -1.10                                 | -3.60                                    | 3.30                     | absent                                                                                                                                               | chr9:86,878,689-86,882,629<br>chr9:86,891,164-86,893,355                                   | absent                                                     |
| Pcnx2         | pecanex-like 2 (Drosophila)                                                              | -0.92                                 | -1.09                                 | -1.29                                    | 2.75                     | absent                                                                                                                                               | chr8:128,395,717-128,397,635                                                               | chr8:128,396,405-128,396,560                               |
| Has2          | hyaluronan synthase 2                                                                    | -0.92                                 | -0.76                                 | -1.16                                    | 4.18                     | absent                                                                                                                                               | chr15:56,349,183-56,350,888                                                                | absent                                                     |
| Nefl          | neurofilament, light polypeptide                                                         | -0.87                                 | -0.79                                 | -0.99                                    | 4.50                     | shown in the other column                                                                                                                            |                                                                                            |                                                            |
| Spock2        | sparc/osteonectin, cwcv and kazal-like domains proteoglycan 2                            | -0.86                                 | -1.08                                 | -1.89                                    | 3.74                     | absent                                                                                                                                               | chr10:59,559,940-59,561,286                                                                | chr10:59,568,493-59,569,043                                |
| Has2          | hyaluronan synthase 2                                                                    | -0.84                                 | -0.76                                 | -1.30                                    | 4.81                     | shown in the other column                                                                                                                            | chr10:59,567,851-59,570,032                                                                |                                                            |
| Gadd45gip1    | growth arrest and DNA-damage-inducible, gamma interacting protein 1                      | -0.83                                 | -0.88                                 | -1.01                                    | 0.37                     | absent                                                                                                                                               | absent                                                                                     | absent                                                     |
| 1700024P16Rik | RIKEN cDNA 1700024P16 gene                                                               | -0.83                                 | -0.57                                 | -0.70                                    | -1.92                    | absent                                                                                                                                               | absent                                                                                     | absent                                                     |
| Sik3a         | serine/threonine kinase 32A                                                              | -0.82                                 | -2.95                                 | -1.87                                    | 2.20                     | shown in the other column                                                                                                                            |                                                                                            |                                                            |
| Robo2         | roundabout homolog 2 (Drosophila)                                                        | -0.80                                 | -0.49                                 | -0.75                                    | 3.93                     | shown in the other column                                                                                                                            |                                                                                            |                                                            |
| Wnt6          | wingless-related MMTV integration site 6                                                 | -0.79                                 | -1.06                                 | -1.16                                    | -1.59                    | shown in the other column                                                                                                                            |                                                                                            |                                                            |
| Pnmt          | phenylethanolamine-N-methyltransferase                                                   | -0.79                                 | -0.70                                 | -1.78                                    | 5.00                     | absent                                                                                                                                               | absent                                                                                     | absent                                                     |
| Ppm1e         | protein phosphatase 1E (PPP2C domain contain)                                            | -0.75                                 | -0.83                                 | -1.47                                    | 3.13                     | absent                                                                                                                                               | absent                                                                                     | absent                                                     |
| Robo2         | roundabout homolog 2 (Drosophila)                                                        | -0.72                                 | -0.70                                 | -1.25                                    | 3.43                     | shown in the other column                                                                                                                            |                                                                                            |                                                            |
| 2610028E06Rik | RIKEN cDNA 2610028E06 gene                                                               | -0.72                                 | -0.63                                 | -3.77                                    | 3.74                     | absent                                                                                                                                               | absent                                                                                     | absent                                                     |
| Spock2        | sparc/osteonectin, cwcv and kazal-like domains proteoglycan 2                            | -0.71                                 | -1.08                                 | -1.53                                    | 4.30                     | shown in the other column                                                                                                                            |                                                                                            |                                                            |
| Krt23         | keratin 23                                                                               | -0.66                                 | -1.02                                 | -0.62                                    | -6.09                    | absent                                                                                                                                               | absent                                                                                     | absent                                                     |
| Meg9          | multiple EGF-like-domains 9                                                              | -0.63                                 | -0.69                                 | -0.94                                    | 1.51                     | chr4:70,149,257-70,152,337*<br>chr4:70,157,125-70,159,298*<br>chr4:70,160,472-70,162,492<br>chr4:70,163,076-70,164,382<br>chr4:70,195,701-70,198,887 | chr4:70,149,909-70,151,851*<br>chr4:70,157,444-70,159,250*<br>chr4:70,195,594-70,199,117   | absent                                                     |
| B3gal5        | UDP-Gal betaGlcNAc beta 1,3-galactosyltransferase, polypeptide 5                         | -0.62                                 | -1.01                                 | -1.70                                    | 1.04                     | absent                                                                                                                                               | chr5:150,477,007-150,478,593                                                               | chr5:150,477,654-150,477,982                               |

Supplementary Table 2

| GeneSymbol    | GeneName                                                                               | Log2 (Sall1 <sup>CreERTox</sup> 48hr) | Log2 (Sall1 <sup>CreERTox</sup> 24hr) | Log2 (Six2Cre; Sall1 <sup>lox/lox</sup> ) | Log2 (Six2 GFP+ vs GFP-) | Sall1 binding                | Six2 binding                | Six2 binding (Park et al., ref3) |
|---------------|----------------------------------------------------------------------------------------|---------------------------------------|---------------------------------------|-------------------------------------------|--------------------------|------------------------------|-----------------------------|----------------------------------|
| Odz2          | odd Oz/ten-m homolog 2 (Drosophila)                                                    | 3.70                                  | 2.48                                  | 2.13                                      | -1.63                    | absent                       | chr11:36,685,840-36,687,519 | chr11:36,686,562-36,686,793      |
| Odz2          | odd Oz/ten-m homolog 2 (Drosophila)                                                    | 3.62                                  | 2.48                                  | 2.10                                      | -1.42                    | absent                       | chr11:36,810,638-36,812,020 |                                  |
| Odz2          | odd Oz/ten-m homolog 2 (Drosophila)                                                    | 3.47                                  | 2.48                                  | 1.47                                      | 0.18                     | absent                       |                             |                                  |
| Nkx6-1        | NK6 homeobox 1                                                                         | 3.10                                  | 2.14                                  | 1.53                                      | -1.47                    | absent                       |                             |                                  |
| 3110082D06Rik | RIKEN cDNA 3110082D06 gene                                                             | 2.68                                  | 1.54                                  | 2.40                                      | -2.74                    | absent                       |                             |                                  |
| Trhr          | thyrotropin releasing hormone receptor                                                 | 2.64                                  | 1.07                                  | 1.86                                      | 0.12                     | chr15:44,020,317-44,022,935  | absent                      | absent                           |
| Krt36         | keratin 36                                                                             | 2.32                                  | 2.08                                  | 2.65                                      | 2.07                     | absent                       | chr11:99,964,150-99,964,350 | absent                           |
| 3110082D06Rik | RIKEN cDNA 3110082D06 gene                                                             | 2.31                                  | 1.54                                  | 2.32                                      | -1.56                    | absent                       |                             | absent                           |
| Krt36         | keratin 36                                                                             | 2.13                                  | 1.99                                  | 2.67                                      | 2.00                     | shown in the other column    | shown in the other column   | shown in the other column        |
| Gm6792        | predicted gene 6792                                                                    | 2.04                                  | 0.61                                  | 0.63                                      | -3.21                    | absent                       |                             | absent                           |
| Rnf152        | ring finger protein 152                                                                | 1.81                                  | 1.33                                  | 1.68                                      | -1.26                    | absent                       |                             | absent                           |
| Kera          | keratocan                                                                              | 1.78                                  | 1.97                                  | 2.05                                      | -1.90                    | absent                       | chr10:97,053,826-97,055,372 | chr10:97,054,393-97,054,612      |
| Pcdh9         | protocadherin 8                                                                        | 1.66                                  | 0.78                                  | 1.02                                      | 4.37                     | absent                       |                             | absent                           |
| Rnf152        | ring finger protein 152                                                                | 1.47                                  | 1.33                                  | 1.76                                      | -0.86                    | shown in the other column    | shown in the other column   | absent                           |
| Cc221a        | chemokine (C-C motif) ligand 21A                                                       | 1.45                                  | 1.30                                  | 1.48                                      | -1.39                    | absent                       |                             | shown in the other column        |
| Lrrc4c        | leucine rich repeat containing 4C                                                      | 1.42                                  | 0.60                                  | 1.68                                      | -0.86                    | absent                       |                             | absent                           |
| Sltk6         | SLIT and NTRK-like family, member 6                                                    | 1.40                                  | 1.40                                  | 0.69                                      | -5.30                    | absent                       |                             | absent                           |
| Saa2          | serum amyloid A 2                                                                      | 1.36                                  | 0.98                                  | 0.75                                      | 5.13                     | absent                       |                             | absent                           |
| Ebf2          | early B-cell factor 2                                                                  | 1.36                                  | 0.66                                  | 0.69                                      | -1.03                    | absent                       |                             | absent                           |
| Fap           | fibroblast activation protein                                                          | 1.34                                  | 0.76                                  | 0.89                                      | -0.37                    | absent                       |                             | absent                           |
| Fap           | fibroblast activation protein                                                          | 1.34                                  | 0.76                                  | 1.56                                      | -5.15                    | shown in the other column    | shown in the other column   | shown in the other column        |
| Krt15         | keratin 15                                                                             | 1.30                                  | 0.87                                  | 2.08                                      | 2.63                     | absent                       |                             | absent                           |
| Rnf152        | ring finger protein 152                                                                | 1.28                                  | 1.33                                  | 1.93                                      | -0.65                    | shown in the other column    | shown in the other column   | shown in the other column        |
| Snph          | synthaphilin                                                                           | 1.24                                  | 1.01                                  | 1.02                                      | 1.46                     | absent                       |                             | absent                           |
| Vegfc         | vascular endothelial growth factor C                                                   | 1.24                                  | 0.62                                  | 1.17                                      | -1.20                    | absent                       |                             | absent                           |
| Gdp2          | glycerophosphodiester phosphodiesterase domain                                         | 1.24                                  | 0.89                                  | 0.74                                      | -0.03                    | absent                       |                             | absent                           |
| Angpt1        | angiotensin-like 1                                                                     | 1.21                                  | 1.45                                  | 0.88                                      | -2.97                    | absent                       |                             | absent                           |
| Gabbr3        | gamma-aminobutyric acid (GABA) A receptor, subunit 3                                   | 1.20                                  | 0.63                                  | 0.72                                      | -1.77                    | absent                       |                             | absent                           |
| Oik3          | oncoprotein induced transcript 3                                                       | 1.18                                  | 0.84                                  | 1.09                                      | -3.46                    | absent                       |                             | absent                           |
| Foxp2         | forkhead box P2                                                                        | 1.18                                  | 1.09                                  | 1.36                                      | -3.50                    | absent                       |                             | absent                           |
| Lypd1         | Ly6/Plaur domain containing 1                                                          | 1.16                                  | 0.87                                  | 0.82                                      | -0.05                    | absent                       |                             | absent                           |
| Egfl6         | EGF-like domain, multiple 6                                                            | 1.12                                  | 0.78                                  | 0.97                                      | -1.57                    | chrX:162,947,271-162,948,745 | absent                      | absent                           |
| Aspm          | asperm                                                                                 | 1.09                                  | 2.14                                  | 1.52                                      | -5.27                    | absent                       |                             | absent                           |
| 5430435G22Rik | RIKEN cDNA 5430435G22 gene                                                             | 1.05                                  | 0.67                                  | 0.68                                      | -1.45                    | absent                       |                             | absent                           |
| Dtna          | dystrobrein alpha                                                                      | 1.05                                  | 0.83                                  | 0.80                                      | 2.06                     | absent                       |                             | absent                           |
| Napsa         | napsin A aspartic peptidase                                                            | 1.05                                  | 0.47                                  | 0.98                                      | -2.72                    | absent                       |                             | absent                           |
| 1700028P14Rik | RIKEN cDNA 1700028P14 gene                                                             | 1.04                                  | 0.61                                  | 0.73                                      | -0.46                    | absent                       |                             | absent                           |
| Epha5         | Eph receptor A5                                                                        | 0.99                                  | 1.37                                  | 1.32                                      | -0.59                    | chr5:84,813,557-84,815,455   | absent                      | absent                           |
| Rspo2         | R-spondin 2 homolog (Xenopus laevis)                                                   | 0.97                                  | 1.80                                  | 1.51                                      | -0.42                    | absent                       | chr5:85,097,634-85,099,671  | absent                           |
| Ebf3          | early B-cell factor 3                                                                  | 0.96                                  | 0.62                                  | 1.77                                      | -3.46                    | absent                       |                             | absent                           |
| Foxp2         | forkhead box P2                                                                        | 0.95                                  | 0.78                                  | 1.36                                      | -2.18                    | shown in the other column    | shown in the other column   | shown in the other column        |
| Dtna          | dystrobrein alpha                                                                      | 0.95                                  | 0.83                                  | 0.70                                      | 1.90                     | shown in the other column    | shown in the other column   | shown in the other column        |
| Shisa9        | shisa homolog 9 (Xenopus laevis)                                                       | 0.95                                  | 0.85                                  | 0.74                                      | -2.70                    | absent                       |                             | absent                           |
| Ebf3          | early B-cell factor 3                                                                  | 0.94                                  | 0.62                                  | 1.38                                      | 0.00                     | shown in the other column    | shown in the other column   | shown in the other column        |
| Sfrp4         | secreted frizzled-related protein 4                                                    | 0.92                                  | 1.26                                  | 1.95                                      | -4.32                    | absent                       |                             | absent                           |
| Htr2b         | 5-hydroxytryptamine (serotonin) receptor 2B                                            | 0.90                                  | 0.80                                  | 0.62                                      | 1.60                     | absent                       | chr1:88,015,600-88,017,322  | absent                           |
| Fibr1         | fin bud initiation factor homolog (zebrafish)                                          | 0.87                                  | 0.75                                  | 1.18                                      | -4.77                    | absent                       |                             | absent                           |
| Ryr3          | ryanodine receptor 3                                                                   | 0.86                                  | 0.60                                  | 0.75                                      | -2.07                    | absent                       |                             | absent                           |
| Nov           | nephroblastoma overexpressed gene                                                      | 0.84                                  | 1.41                                  | 1.30                                      | -2.10                    | chr15:54,477,140-54,478,129  | absent                      | absent                           |
| Dtna          | dystrobrein alpha                                                                      | 0.82                                  | 0.83                                  | 0.73                                      | 0.71                     | shown in the other column    | shown in the other column   | shown in the other column        |
| Col5a3        | collagen, type V, alpha 3                                                              | 0.76                                  | 0.64                                  | 1.17                                      | -3.92                    | chr9:20,557,700-20,558,700   | absent                      | absent                           |
| Ddx4          | DEAD (Asp-Glu-Ala-Asp) box polypeptide 4                                               | 0.76                                  | 1.01                                  | 0.64                                      | -0.20                    | absent                       |                             | absent                           |
|               |                                                                                        | 0.75                                  | 0.93                                  | 1.16                                      | -4.17                    | chr5:13,325,149-13,327,960   | absent                      | absent                           |
| Sema3a        | sema domain, immunoglobulin domain (Ig), short basic domain, secreted, (semaphorin) 3A |                                       |                                       |                                           |                          | chr5:13,397,505-13,402,459   |                             |                                  |
|               |                                                                                        |                                       |                                       |                                           |                          | chr5:13,402,643-13,406,956   |                             |                                  |
|               |                                                                                        |                                       |                                       |                                           |                          | chr5:13,426,453-13,427,898   |                             |                                  |
| Bmp5          | bone morphogenetic protein 5                                                           | 0.75                                  | 0.72                                  | 0.86                                      | -2.33                    | absent                       |                             | absent                           |
| Oik3          | oncoprotein induced transcript 3                                                       | 0.75                                  | 0.84                                  | 0.77                                      | -0.83                    | shown in the other column    | shown in the other column   | shown in the other column        |
| Cldn1         | claudin 1                                                                              | 0.75                                  | 1.30                                  | 1.55                                      | -4.40                    | absent                       |                             | absent                           |
| Tbx1          | T-box 1                                                                                | 0.75                                  | 0.72                                  | 1.03                                      | -3.54                    | absent                       |                             | absent                           |
| Trem2         | triggering receptor expressed on myeloid cells 2                                       | 0.72                                  | 0.61                                  | 0.68                                      | 0.06                     | absent                       |                             | absent                           |
| Ms4a7         | membrane-spanning 4-domains, subfamily A, member 7                                     | 0.72                                  | 0.66                                  | 1.38                                      | 0.71                     | absent                       |                             | absent                           |
| Fxyd7         | FXD domain-containing ion transport regulator 7                                        | 0.70                                  | 0.68                                  | 1.22                                      | -0.78                    | absent                       |                             | absent                           |
| Cldn1         | claudin 1                                                                              | 0.69                                  | 1.30                                  | 1.28                                      | -5.01                    | shown in the other column    | shown in the other column   | shown in the other column        |
| Ms4a7         | membrane-spanning 4-domains, subfamily A, member 7                                     | 0.69                                  | 0.66                                  | 1.43                                      | 0.75                     | shown in the other column    | shown in the other column   | shown in the other column        |
| Col12a1       | collagen, type XII, alpha 1                                                            | 0.68                                  | 0.74                                  | 0.81                                      | -4.30                    | absent                       |                             | absent                           |
| Trem2         | triggering receptor expressed on myeloid cells 2                                       | 0.65                                  | 0.61                                  | 0.77                                      | -0.00                    | shown in the other column    | shown in the other column   | shown in the other column        |
| Sema3a        | sema domain, immunoglobulin domain (Ig), short basic domain, secreted, (semaphorin) 3A | 0.64                                  | 0.83                                  | 1.26                                      | -5.00                    | shown in the other column    | shown in the other column   | shown in the other column        |
| Pcdh20        | protocadherin 20                                                                       | 0.64                                  | 0.88                                  | 1.37                                      | -3.22                    | absent                       |                             | absent                           |
| March11       | membrane-associated ring finger (C3HC4) 11                                             | 0.62                                  | 0.72                                  | 0.66                                      | -4.09                    | absent                       |                             | absent                           |
| Pam1          | prostate androgen-regulated mucin-like protein 1                                       | 0.61                                  | 0.64                                  | 1.13                                      | -1.91                    | absent                       |                             | absent                           |
| Bmp5          | bone morphogenetic protein 5                                                           | 0.61                                  | 0.72                                  | 0.75                                      | 0.44                     | shown in the other column    | shown in the other column   | shown in the other column        |
| Fgf1          | c-fos induced growth factor                                                            | 0.60                                  | 0.82                                  | 1.18                                      | -4.93                    | absent                       |                             | absent                           |
| Ccdc113       | coiled-coil domain containing 113                                                      | 0.60                                  | 0.91                                  | 1.13                                      | -4.03                    | absent                       |                             | absent                           |
| Slurp1        | secreted Ly6/Plaur domain containing 1                                                 | 0.59                                  | 0.49                                  | 1.25                                      | -0.70                    | absent                       |                             | absent                           |

Supplementary Table 3

|                      | Gene Symbol             | Log2 (Sall1 <sup>CreER/lox</sup> 48hr) | Log2 (Sall1 <sup>CreER/lox</sup> 24hr) | Log2 (Six2Cre; Sall1 <sup>lox/lox</sup> ) | Log2 (Six2 GFP+ vs GFP-) | Sall1 binding                 | Six2 binding                  | Six2 binding (Park et al.; ref3) |                              |
|----------------------|-------------------------|----------------------------------------|----------------------------------------|-------------------------------------------|--------------------------|-------------------------------|-------------------------------|----------------------------------|------------------------------|
| Progenitor-related   |                         | -2.8                                   | -0.72                                  | -1.27                                     | 1.65                     | chr8:91,559,382-91,564,748    | chr8:91,569,591-91,571,276    |                                  |                              |
|                      | Sall1                   |                                        |                                        |                                           |                          | chr8:91,910,504-91,914,563    | chr8:91,913,350-91,913,805    |                                  |                              |
|                      |                         |                                        |                                        |                                           |                          | chr8:91,935,147-91,937,179*   | chr8:91,935,304-91,937,293*   | chr8:91,936,103-91,936,284       |                              |
|                      |                         |                                        |                                        |                                           |                          | chr8:91,962,070-91,964,145    | chr8:91,938,409-91,940,376    | chr8:91,939,275-91,939,431       |                              |
|                      |                         |                                        |                                        |                                           |                          |                               | chr8:91,982,978-91,984,393    |                                  |                              |
|                      |                         |                                        |                                        |                                           |                          | chr8:92,085,399-92,088,663    | chr8:92,085,787-92,088,204    |                                  |                              |
|                      |                         |                                        |                                        |                                           |                          | chr8:92,092,399-92,094,667*   | chr8:92,129,157-92,130,804*   |                                  |                              |
|                      |                         |                                        |                                        |                                           |                          | chr8:92,094,825-92,096,530    |                               |                                  |                              |
|                      |                         |                                        |                                        |                                           |                          | chr8:92,182,190-92,186,278*   | chr8:92,182,364-92,184,152*   | chr8:92,130,054-92,130,238       |                              |
|                      |                         |                                        |                                        |                                           |                          |                               | chr8:92,184,846-92,186,022    |                                  |                              |
|                      |                         |                                        |                                        |                                           |                          | chr8:92,197,793-92,199,765*   | chr8:92,198,196-92,199,608*   |                                  |                              |
|                      | Six2                    | -0.52                                  | -0.5                                   | -1.62                                     | 5.87                     | chr8:92,239,090-92,242,534    | chr8:92,230,587-92,232,637    | chr17:86,087,682-86,087,809      |                              |
|                      |                         |                                        |                                        |                                           |                          | chr17:86,087,020-86,088,664   | chr17:86,146,706-86,149,340*  | chr17:86,147,979-86,148,273      |                              |
|                      |                         |                                        |                                        |                                           |                          | chr17:86,145,975-86,149,207*  | chr17:86,196,249-86,200,295   | chr17:86,198,467-86,198,745      |                              |
|                      | Pax2                    | 0.29                                   | 0.17                                   | -0.57                                     | 1.22                     | chr19:44,706,202-44,707,935*  | chr19:44,705,424-44,708,047*  |                                  |                              |
|                      |                         |                                        |                                        |                                           |                          | chr19:44,743,902-44,746,867   | chr19:44,718,402-44,720,395   |                                  |                              |
|                      |                         |                                        |                                        |                                           |                          |                               | chr19:44,743,623-44,745,539   |                                  |                              |
|                      | Eya1                    | -0.35                                  | 0.09                                   | -1.09                                     | 0.04                     |                               | chr1:14,234,375-14,235,693    | chr1:14,235,103-14,235,289       |                              |
|                      |                         |                                        |                                        |                                           |                          | chr1:14,451,499-14,453,661    |                               |                                  |                              |
|                      |                         |                                        |                                        |                                           |                          | chr1:14,558,658-14,561,609    | chr1:14,560,514-14,560,929    |                                  |                              |
|                      |                         |                                        |                                        |                                           |                          |                               | chr1:14,577,583-14,579,048    |                                  |                              |
|                      |                         |                                        |                                        |                                           |                          | chr1:14,624,565-14,627,013*   | chr1:14,624,969-14,626,797*   | chr1:14,625,742-14,625,927       |                              |
|                      | Wt1                     | 0.15                                   | 0.09                                   | -0.49                                     | 1.15                     | chr2:104,863,154-104,864,824* | chr2:104,862,758-104,865,023* | chr1:14,706,626-14,706,934       |                              |
|                      |                         |                                        |                                        |                                           |                          | chr2:104,882,731-104,886,149  |                               |                                  |                              |
|                      |                         |                                        |                                        |                                           |                          |                               | chr2:104,867,037-104,868,414  |                                  |                              |
|                      |                         |                                        |                                        |                                           |                          |                               | chr2:104,902,608-104,904,049  |                                  |                              |
|                      |                         |                                        |                                        |                                           |                          |                               | chr2:104,928,528-104,931,383  |                                  |                              |
|                      | Cited1                  | -2.87                                  | -2.18                                  | -4.18                                     | 4.8                      | absent                        | chrX:99514,619-99,515,712     | absent                           |                              |
|                      | Osr1                    | -0.99                                  | -0.82                                  | -0.87                                     | 5.11                     |                               | chr12:9,265,136-9,266,406     |                                  |                              |
|                      |                         |                                        |                                        |                                           |                          | chr12:9,583,063-98,855,408    |                               |                                  |                              |
|                      |                         |                                        |                                        |                                           |                          |                               | chr12:9,663,412-9,665,066     |                                  |                              |
|                      |                         |                                        |                                        |                                           |                          |                               | chr12:9,990,485-9,990,011*    |                                  |                              |
|                      |                         |                                        |                                        |                                           |                          |                               | chr12:10,134,583-10,136,241   |                                  |                              |
|                      | FGF1                    | -1.52                                  | -1.52                                  | -1.67                                     | 5.52                     | absent                        | chr18:39,034,094-39,035,438   | chr18:39,034,516-39,034,806      |                              |
|                      |                         |                                        |                                        |                                           |                          |                               | chr18:39,040,772-39,042,700   | chr18:39,041,961-39,042,307      |                              |
|                      | FGF2                    | 0.07                                   | 0.14                                   | -0.15                                     | -0.47                    | absent                        | absent                        | absent                           |                              |
|                      | FGF9                    | 0.04                                   | -0.1                                   | -0.68                                     | 1.7                      | absent                        | chr14:59,107,122-59,108,879   | chr14:59,107,730-59,108,069      |                              |
|                      | FGF20                   | -0.34                                  | -0.4                                   | -0.32                                     | 6.85                     | absent                        | chr14:59,134,560-59,136,448   | chr14:59,135,528-59,135,796      |                              |
|                      | BMP7                    | -1.08                                  | -0.27                                  | -0.74                                     | 1.15                     | absent                        | chr8:41,324,122-41,326,059    | chr8:41,325,166-41,325,419       |                              |
|                      |                         |                                        |                                        |                                           |                          |                               | chr2:172,667,102-172,668,820  | chr2:172,667,933-172,668,149     |                              |
|                      | Hoxa2                   |                                        |                                        |                                           |                          | chr6:52,112,980-52,116,365    | absent                        | absent                           |                              |
|                      | Hoxa5                   |                                        |                                        |                                           |                          | chr6:52,159,318-52,165,129    |                               |                                  |                              |
|                      | Hoxa9                   |                                        |                                        |                                           |                          | chr6:52,175,369-52,182,159    |                               |                                  |                              |
| Differentiation      | Wnt9b                   | -0.01                                  | -0.06                                  | 0.5                                       | -3.52                    | absent                        | absent                        | absent                           |                              |
|                      | Wnt4                    | 0.37                                   | -0.02                                  | -0.71                                     | -1.59                    | absent                        | chr4:136,777,571-136,774,226  | chr4:136,773,187-136,773,353     |                              |
|                      | LEF1                    | 0.19                                   | -0.1                                   | 0.29                                      | -4.26                    | absent                        | absent                        | chr3:130440576-130440757         |                              |
|                      | Dkk1                    | -2.1                                   | -0.98                                  | -1.73                                     | -5.71                    | absent                        | absent                        | absent                           |                              |
|                      | FGF8                    | 0.14                                   | -0.13                                  | -1.05                                     | 1.3                      | absent                        | chr19:45,695,222-45,697,760   | chr19:45695446-45695814          |                              |
|                      | Jag1                    | -0.07                                  | 0.06                                   | -0.83                                     | -3.87                    | absent                        | chr2:136,990,923-136,992,487  | absent                           |                              |
|                      | Notch1                  | 0.16                                   | 0.29                                   | -0.75                                     | -0.41                    | absent                        | chr2:26,396,629-26,398,109    | absent                           |                              |
|                      | Notch2                  | 0.07                                   | 0.22                                   | -0.14                                     | 0.24                     | absent                        | chr3:97,740,586-97,742,523    | absent                           |                              |
|                      | Hnf1b                   | -0.14                                  | 0.37                                   | -0.82                                     | -3.62                    | chr11:83,629,065-83,631,720   | absent                        | absent                           |                              |
|                      | Adhesion/repulsion      | Integrin α3                            | 0.18                                   | 0.13                                      | 0.05                     | 0.84                          | absent                        | absent                           | absent                       |
|                      |                         | Integrin α8                            | -0.12                                  | -0.31                                     | -0.82                    | 2.28                          | absent                        | chr2:11,940,289-11,942,124       | chr2:11,941,243-11,941,615   |
|                      |                         | Integrin β1                            | -0.26                                  | -0.03                                     | 0.05                     | -0.67                         | absent                        | chr8:130,948,221-130,949,370     | chr8:130,948,920-130,949,219 |
|                      | Robo2                   | -0.75                                  | -0.57                                  | -1.01                                     | 3.42                     | chr16:73,529,347-73,531,168   | chr16:73,530,336-73,530,636   |                                  |                              |
|                      |                         |                                        |                                        |                                           |                          | chr16:73,533,609-73,533,909   |                               |                                  |                              |
|                      |                         |                                        |                                        |                                           |                          | chr16:74,457,123-74,459,457*  | chr16:74,457,244-74,459,474*  | chr16:74,458,499-74,458,753      |                              |
|                      |                         |                                        |                                        |                                           |                          | chr16:74,464,261-74,466,231   | chr16:74,467,369-74,469,755   |                                  |                              |
|                      | Slit2                   | 0.01                                   | -0.05                                  | -0.01                                     | -0.4                     | chr5:47,947,543-47,949,658    | chr5:47,947,543-47,949,658    | chr5:47,948,014-47,948,303       |                              |
| Extracellular matrix | Nephronectin            | 0.16                                   | -0.1                                   | -0.84                                     | -2.71                    | absent                        | absent                        | absent                           |                              |
|                      | Laminin alpha1          | -0.28                                  | 0                                      | -1.17                                     | -2.95                    | absent                        | absent                        | chr17:67982218-67982477          |                              |
|                      | Laminin alpha5          | 0.05                                   | 0.07                                   | -0.31                                     | 0.03                     | absent                        | absent                        | absent                           |                              |
|                      | Laminin beta1           | 0.12                                   | 0.14                                   | -0.06                                     | -1.56                    | absent                        | absent                        | absent                           |                              |
|                      | Laminin beta2           | 0.22                                   | 0.17                                   | 0.2                                       | 0.04                     | absent                        | absent                        | absent                           |                              |
|                      | Laminin gamma1          | 0.08                                   | 0.18                                   | -0.22                                     | -1.1                     | absent                        | absent                        | absent                           |                              |
|                      | COL4A3                  | 0.94                                   | 0.25                                   | 0.38                                      | absent                   | absent                        | absent                        | absent                           |                              |
|                      | COL4A4                  | 0.45                                   | 0.07                                   | 0.58                                      | -1.56                    | absent                        | absent                        | absent                           |                              |
|                      | COL4A5                  | 0.05                                   | -0.01                                  | 0.58                                      | -0.2                     | absent                        | absent                        | absent                           |                              |
|                      | Ureteric bud attraction |                                        | -0.76                                  | -0.66                                     | -0.06                    | 1.11                          | chr15:7,411,984-7,413,234     | chr15:7,411,984-7,413,234        | chr15:7,412,321-7,412,817    |
|                      | Gdnf                    |                                        |                                        |                                           |                          | chr15:7,463,342-7,465,268     |                               |                                  |                              |
|                      |                         |                                        |                                        |                                           |                          | chr15:7,472,514-7,474,370     |                               |                                  |                              |
|                      |                         |                                        |                                        |                                           |                          |                               | chr15:7,551,156-7,552,891     |                                  |                              |
|                      |                         |                                        |                                        |                                           |                          |                               | chr15:7,562,479-7,563,621     |                                  |                              |
|                      |                         |                                        |                                        |                                           |                          |                               | chr15:7,574,199-7,575,862*    |                                  |                              |
|                      | Ret                     | -0.5                                   | -0.25                                  | -0.24                                     | -6.67                    | absent                        | chr15:7,647,427-7,648,858     | absent                           |                              |
|                      | Etv4                    | -0.06                                  | -0.27                                  | -1.22                                     | 1.37                     | absent                        | chr11:101,632,947-101,634,979 | chr11:101,633,863-101,634,122    |                              |
|                      | Etv5                    | 0.04                                   | -0.1                                   | -1.3                                      | 0.49                     | absent                        | absent                        | absent                           |                              |
|                      | Sprouty1                | -0.12                                  | -0.15                                  | -0.6                                      | -0.46                    | absent                        | absent                        | chr3:37,538,702-37,538,895       |                              |
|                      | FGF10                   | 0.04                                   | -0.07                                  | -0.3                                      | 2.19                     | absent                        | absent                        | absent                           |                              |
|                      | BMP4                    | -0.15                                  | 0.23                                   | -0.21                                     | -1.06                    | absent                        | chr14:47,195,029-47,195,717   | chr14:47,195,735-47,195,901      |                              |
|                      |                         |                                        |                                        |                                           |                          | absent                        | chr14:47,213,357-47,215,049   | chr14:47,213,638-47,214,076      |                              |
|                      | Gremlin                 | -0.43                                  | 0.05                                   | -1.38                                     | -0.83                    | absent                        | chr14:47,337,540-47,338,880   | chr14:47,338,153-47,338,279      |                              |
|                      | Klf26b                  | -0.29                                  | -0.32                                  | -1.67                                     | 2.85                     | chr1:180,457,002-180,459,602  | absent                        | absent                           |                              |
|                      |                         |                                        |                                        |                                           |                          | chr1:180,613,106-180,614,972  | chr1:180,613,939-180,614,184  |                                  |                              |



**Supplementary Table 4**

Primers for ChIP-qPCR

Six2-1F 5'-CAG CAG CTG TAT CCA GGT CA-3'  
 Six2-1R 5'-CAA TGG GCA CAT GAA CAA AG-3'  
 Six2-2F 5'-GGG GTT TAT GGT TCA CAA CG-3'  
 Six2-2R 5'-GGG AAG AAA AAC CAT GTC CA-3'  
 Six2-3F 5'-CCA TGA GAG ATT CCC TTC CA-3'  
 Six2-3R 5'-CCG GAG TAC TGA AGC CAG AG-3'

Primers for qRT-PCR

b-actin F 5'-CATCCGTAAGACCTCTATGCCAAC-3'  
 b-actin R 5'-ATGGAGCCACCGATCCACA-3'  
 Sall1 F 5'-TGTCAAGTTCCAGAAATGTTCCA-3'  
 Sall1 R 5'-ATGCCGCGTCTGAAATGA-3'  
 Six2 F 5'-GCAACTTCCGCGAGCTCTAC-3'  
 Six2 R 5'-GCCTTGAGCCACAACCTGCTG-3'  
 Osr1 F 5'-ACTGATGAGCGACCTTACACCTG-3'  
 Osr1 R 5'-ACTTGTGAGTGAGCGCTTTGTGGA-3'  
 Cited1 F 5'-GTCGAGGCGCTGCACTTGATG-3'  
 Cited1 R 5'-CCAAGGTTGGAGTAGGCCAGAG-3'  
 Odz2 F 5'-GAGGTCCCAGATTACATCAGTCA-3'  
 Odz2 R 5'-TTTCCATCCAGGCGTTCCA-3'  
 Nkx6.1 F 5'-AGCACGCTTGGCCTATTCTC-3'  
 Nkx6.1 R 5'-CACTGGTCTCGGTTCTG-3'

Oligonucleotides for EMSA

|    | Name         | Sequence                                          | Position of Sall1 probe     | Position of Six2 binding motif | Six2 consensus<br>GNAACNNNANNC |                                          |
|----|--------------|---------------------------------------------------|-----------------------------|--------------------------------|--------------------------------|------------------------------------------|
| 1  | Osr1-Wt-Fw   | 5'-GTATATATTATCCTGCAAAAAGAAAGCATAAC-3'            | chr12:9,905,826-9,905,856   | chr12:9,905,421-9,905,432      | GGAACCTGACAC                   | 394bp up stream of Sall1 binding motif   |
| 2  | Osr1-Mt-Fw   | 5'-GTATATATTgTCTGCAAAAAGAAAGCAcAAC-3'             |                             |                                |                                |                                          |
| 3  | Six2-Wt-Fw   | 5'-CTGGAGAAATAAACTGAGTTATTGTTCC-3'                | chr17:86,147,858-86,147,887 | chr17:86,148,253-86,148,264    | GAAACCCGACCC                   | 366bp down stream of Sall1 binding motif |
| 4  | Six2-Mt-Fw   | 5'-CTGGAGAAAcAAAACAGTTgTTGTTCC-3'                 |                             |                                |                                |                                          |
| 5  | Eya1-Wt-Fw   | 5'-CATAAATAGAGTAAATACATTTAATTTTCATTTCTATATTATC-3' | chr1:14,625,520-14,625,562  | chr1:14,625,819-14,625,830     | GTAACACTCCC                    | 257bp down stream of Sall1 binding motif |
| 6  | Eya1-Mt-Fw   | 5'-CAcAcAGAGTAggTACATTTggccTTCATccTATATggTC-3'    |                             |                                |                                |                                          |
| 7  | Robo2-Wt-Fw  | 5'-CAGATAGTTTCATAATGAAATTTCTTTTATGTTGAATCC-3'     | chr16:74,514,526-74,514,565 | chr16:74,515,053-74,515,063    | GTTTGAGTTAC<br>(complementary) | 435bp down stream of Sall1 binding motif |
| 8  | Robo2-Mt-Fw  | 5'-CAGATAGccTCAcAATGGGATtCTTctgTGTTGggTCC-3'      |                             |                                |                                |                                          |
| 9  | Megf9-Wt-Fw  | 5'-GGCACTAAATAAAACGGCAAAGTCATAAAAATTTAATTTG-3'    | chr4:70,150,276-70,150,315  | chr4:70,150,664-70,150,675     | GTTTTAGTTCC<br>(complementary) | 349bp down stream of Sall1 binding motif |
| 10 | Megf9-Mt-Fw  | 5'-GGCACTAgAcAggACGGCAAAGTCAcAccAATcTccTTTG-3'    |                             |                                |                                |                                          |
| 11 | Cited1-Wt-Fw | 5'-TTACAAGCAATTAATAACACTAAAATAGATTTATACAGG-3'     | chrX:99,515,395-99,515,434  | chrX:99,515,343-99,515,353     | GGAAATGACTC                    | 42bp up stream of Sall1 binding motif    |
| 12 | Cited1-Mt-Fw | 5'-TTACAAGCAAccAggATACACTAggATAGAggTcTACAGG-3'    |                             |                                |                                |                                          |
